# Supplementary material for: Metal–organic frameworks with six- and four-fold interpenetration and their photoluminescence and adsorption property
Source: Royal Society of Chemistry journal article supplement (doi:10.1039/b904784k), 2009-01-01
Supplement: b904784k.pdf [file b904784k.pdf]

***Supporting Information:***

**Metal-Organic Frameworks with Six- and Four-Fold Interpenetration  
and Their Photoluminescence and Adsorption Property**

**Jing Xu, Zheng-Shuai Bai, Man-Sheng Chen, Zhi Su, Shui-Sheng Chen and Wei-Yin Sun\***

*Coordination Chemistry Institute, State Key Laboratory of Coordination Chemistry, School of Chemistry and Chemical Engineering, Nanjing National Laboratory of Microstructures, Nanjing University, Nanjing 210093, China*

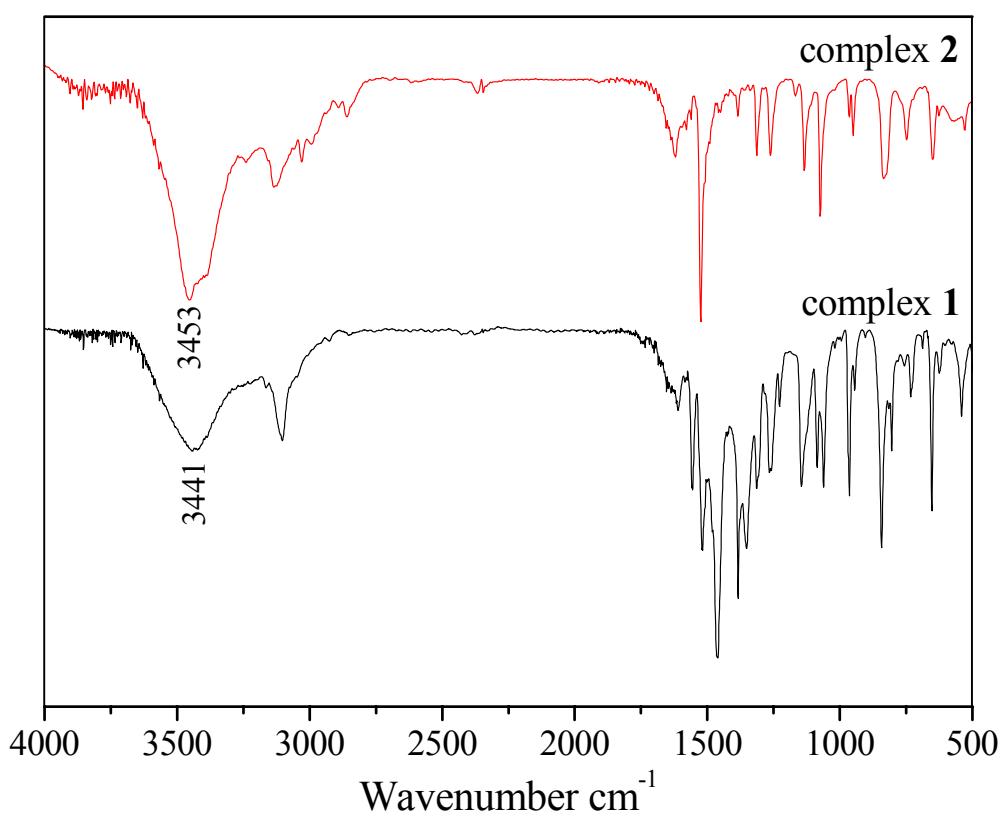

Figure S1. The IR spectra of **1** and **2**.

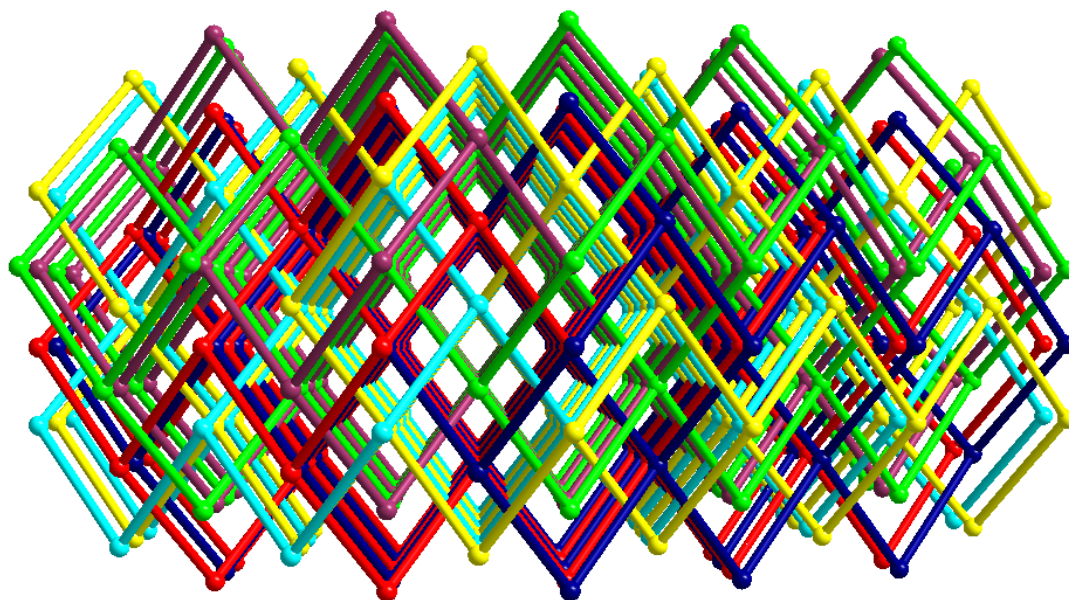

Figure S2 The topology mode of 6-fold interpenetrating network of **1** .

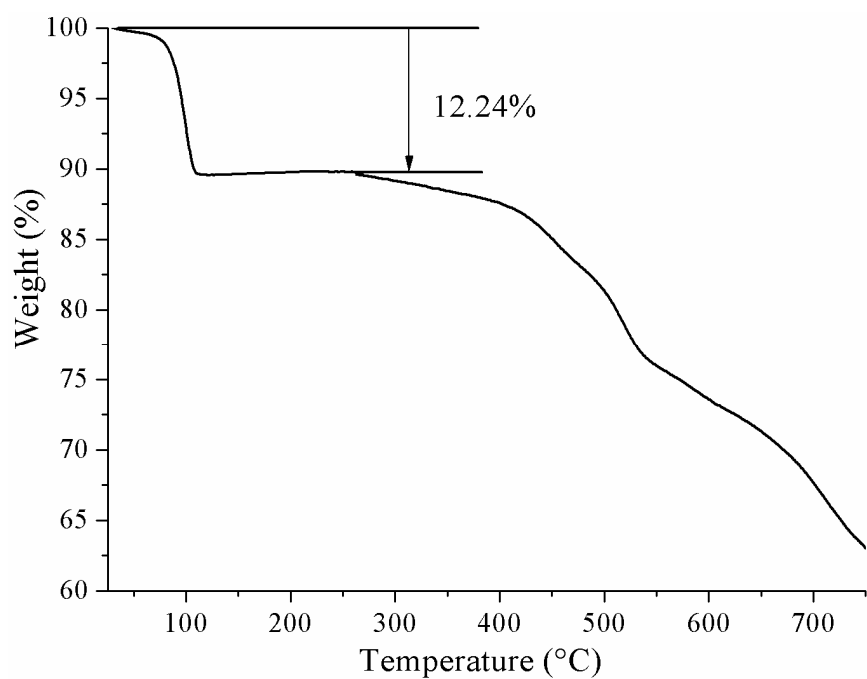

(a)

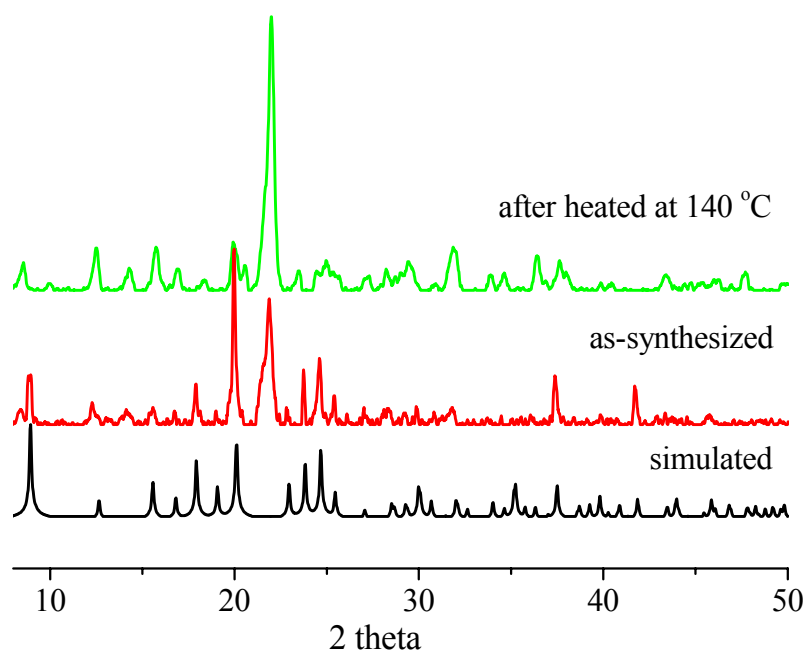

(b)

**Figure S3.** (a) TGA curve of **1**. (b) XRD patterns simulated from single crystal structure, as-synthesized sample and the sample after heated at 140 °C for 24 h in vacuum.

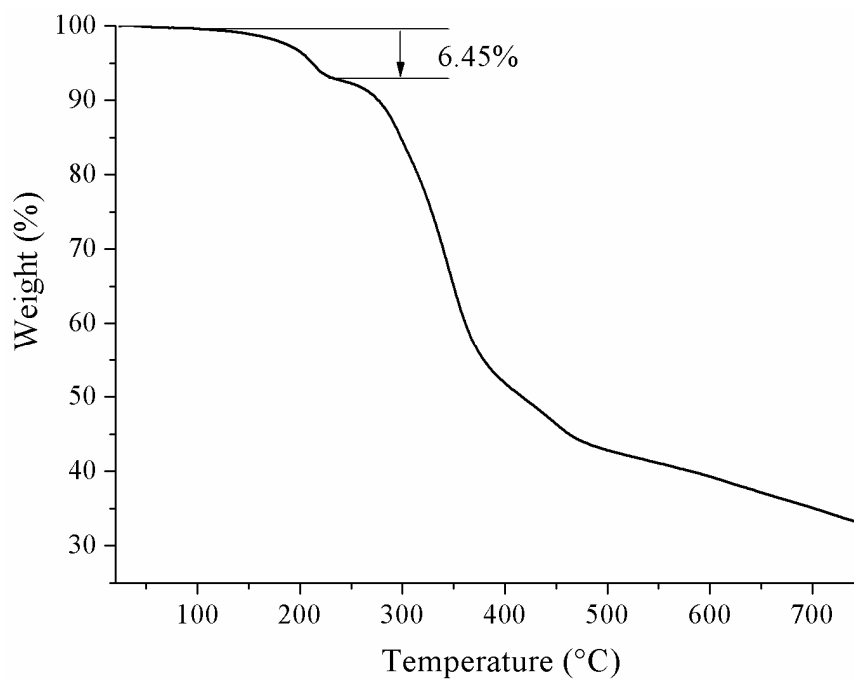

Figure S4. The TGA curve of **2**.
